# Supplementary material for: Transcriptomic Profiling and Physiological Responses of Halophyte Kochia sieversiana Provide Insights into Salt Tolerance
Source: PubMed Central journal article supplement (PMC5705942; doi:10.3389/fpls.2017.01985), 2017-11-24

## *Supplementary Material*

# **Transcriptomic profiling and physiological responses of halophyte *Kochia sieversiana* provide insights into salt tolerance**

**Long Zhao<sup>1</sup>, Zongze Yang<sup>1</sup>, Jiaopin Guo<sup>1</sup>, Shun Mao<sup>1</sup>, Shaoqiang Li<sup>1</sup>, Fasheng Sun<sup>1</sup>, Huan Wang<sup>2</sup> and Chunwu Yang<sup>1\*</sup>**

<sup>1</sup>Key laboratory of Molecular Epigenetics of Ministry of Education (MOE), Northeast Normal University, Changchun 130024, China

<sup>2</sup>Department of Agronomy, Jilin Agricultural University, Changchun 130018, China

**\*Correspondence:**

Dr. Chunwu Yang

E-mail: 45447087@qq.com

## Supplementary Figures and Tables

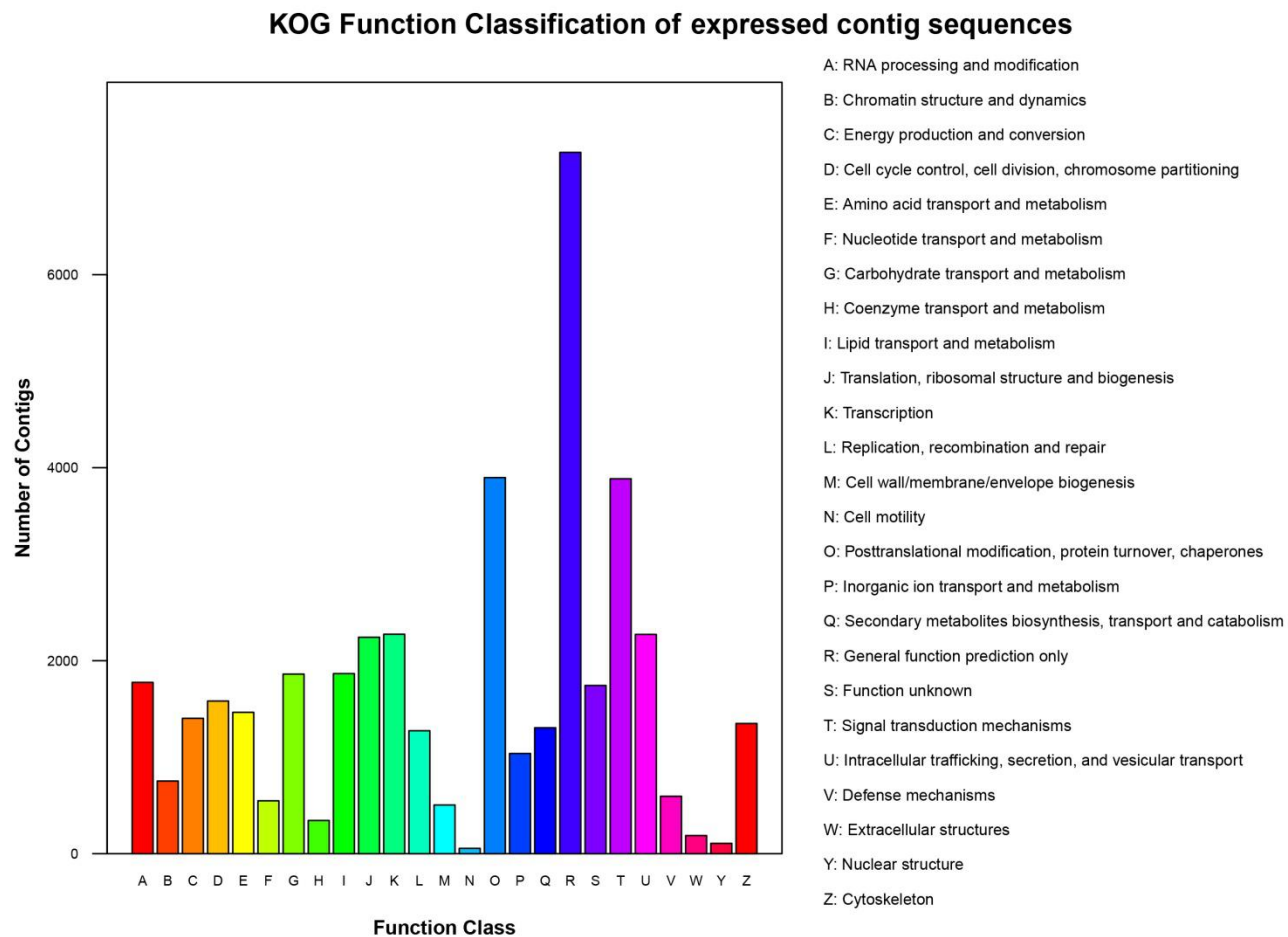

**Supplementary Figure 1.** COG functional classification of expressed contig sequences of *K. sieversiana*. The 30-d-old seedlings were subjected to 0, 80, and 480mM NaCl for 2 d.

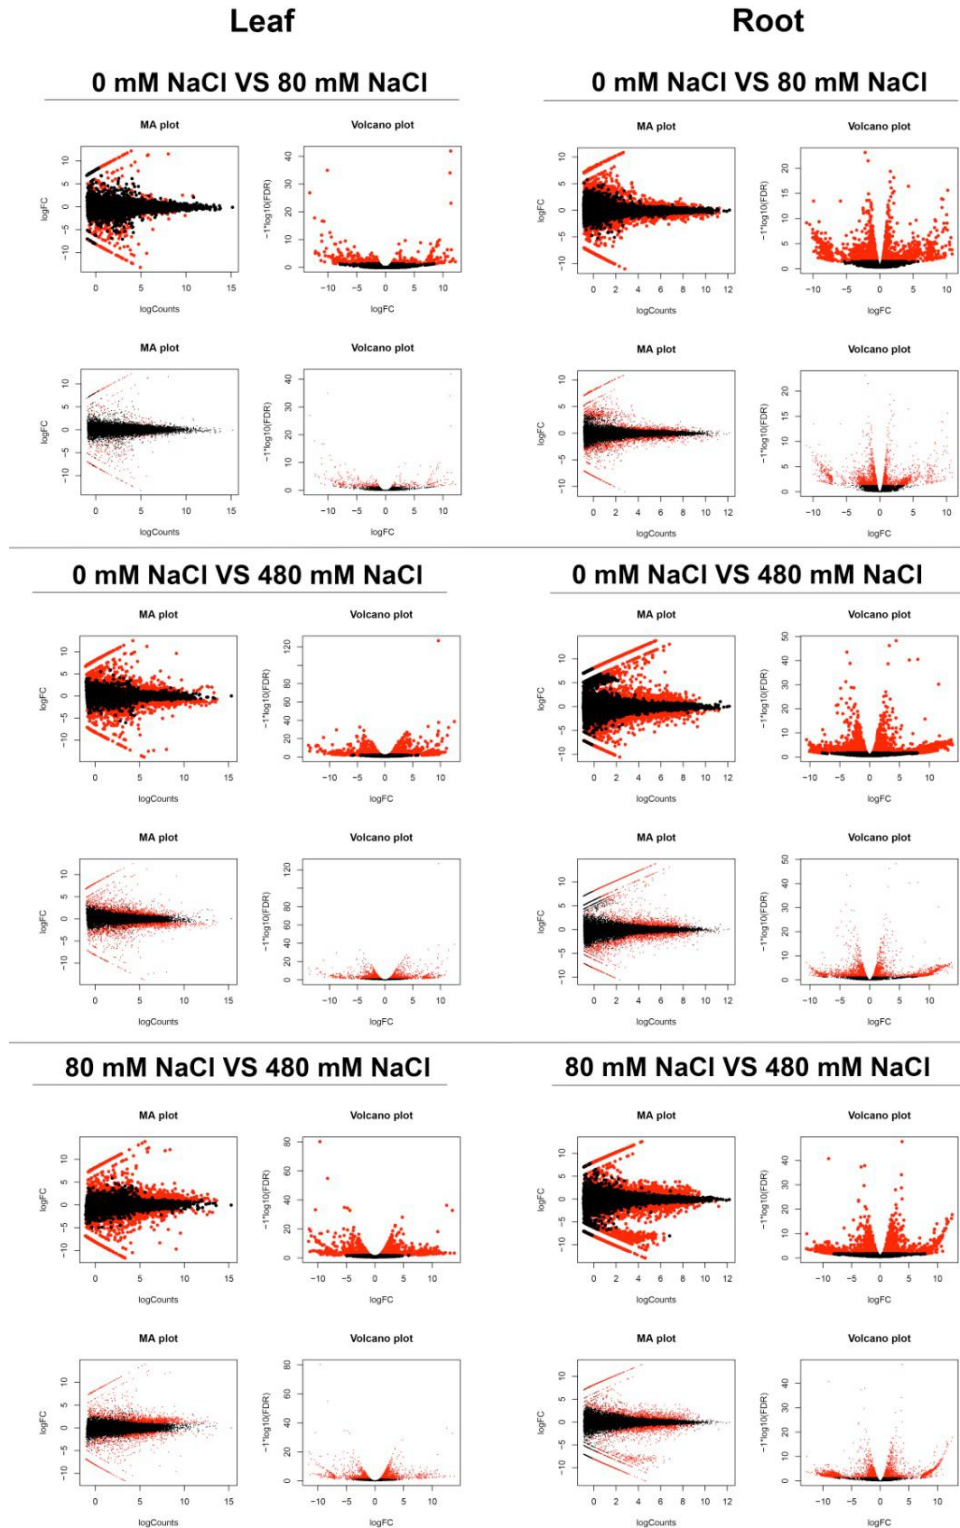

**Supplementary Figure 2.** MA and volcano plots of responses to different NaCl treatments in the leaf and root of *K. sieversiana*. LogFC represents the  $\log_2(\text{Fold change})$ , logCounts represents the  $\log_2(\text{number of counts})$ , and  $-1 \times \log_{10}(\text{FDR})$  represents  $-1 \times \log_{10}(\text{false discovery rate})$ . The 30-d-old seedlings were subjected to 0, 80 and 480 mM NaCl for 2 d.

# Correlation of DEGs in root

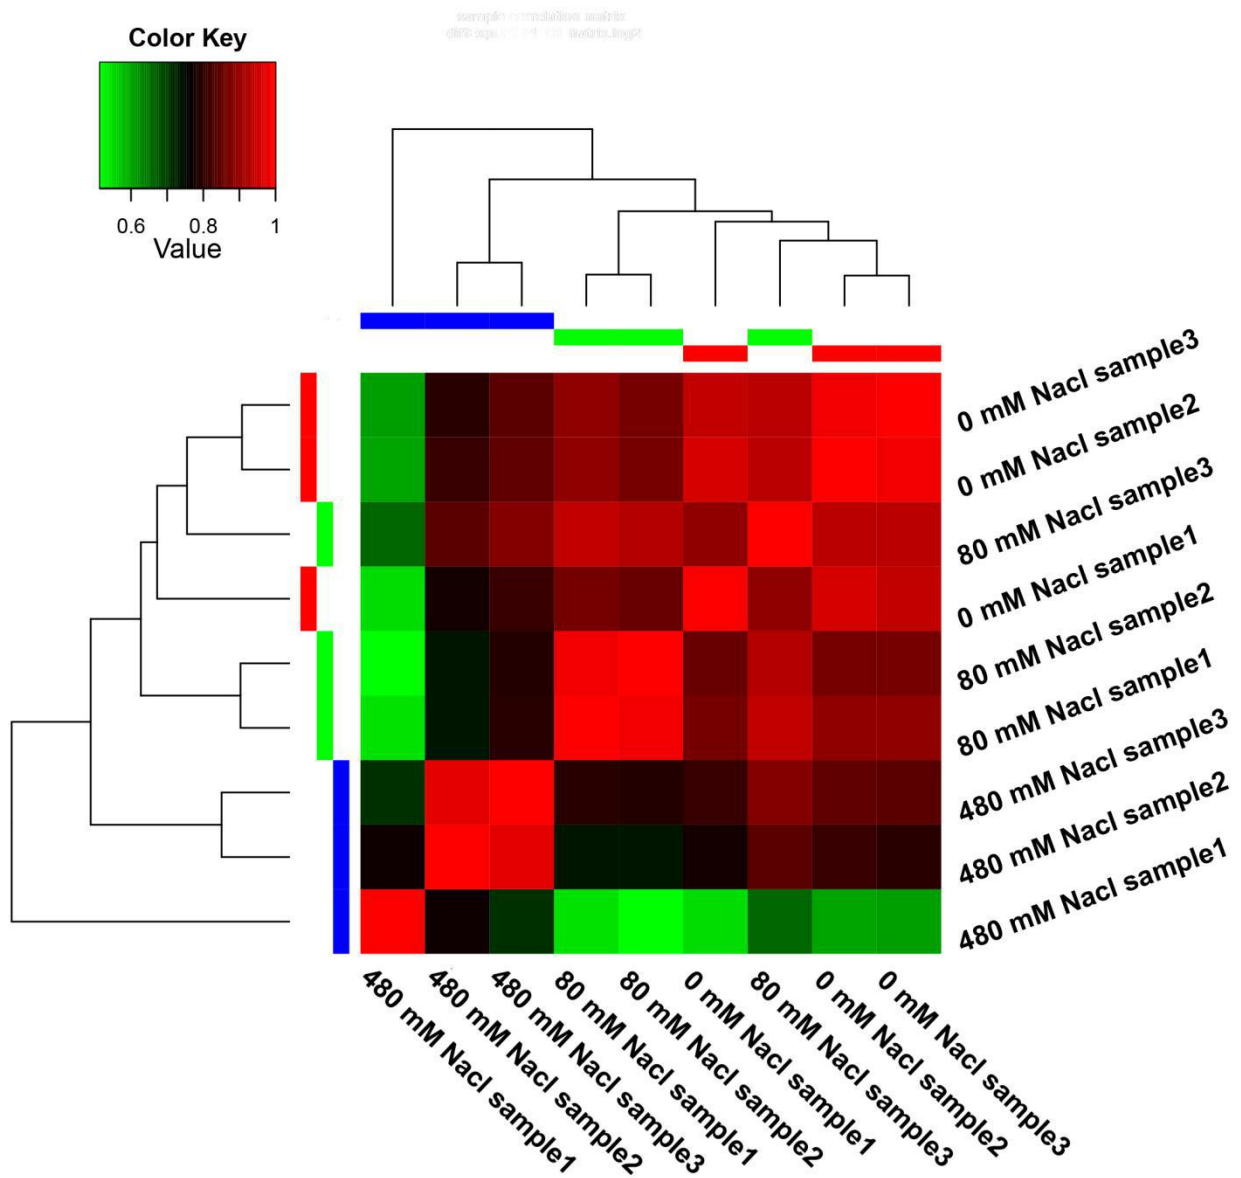

**Supplementary Figure 3.** Correlations of gene expression levels of nine root samples. The 30-d-old seedlings were subjected to 0, 80, and 480mM NaCl for 2 d.

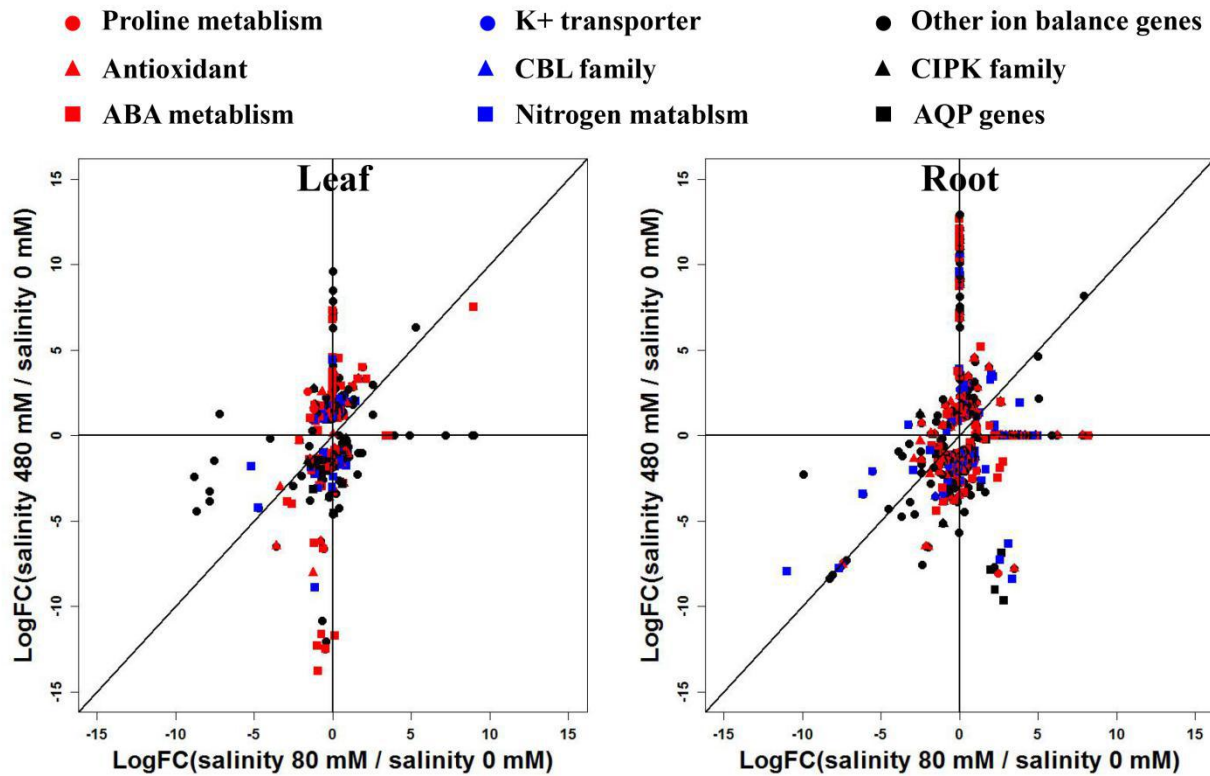

**Supplementary Figure 4.** Effects of different salinity levels on the expression of salinity-tolerant unigenes in the leaves and roots of *K. sieversiana*. Icons represent differentially expressed salinity tolerance genes. *X*-axis= Log<sub>2</sub> of the ratio of 80-mM salinity to control in gene expression level, and *y*-axis = Log<sub>2</sub> of the ratio of 480-mM salinity to control. The icons close to the *x*-axis indicated unigenes that have small expression differences between 80mM salinity and control, the icons close to the *y*-axis indicate unigenes that have small expression differences between 480mM salinity and control, and the icons that fell on the diagonal *x*=*y* line indicated that 80 and 480mM salinity produced identical effects on the expression of the unigenes. The 30-d-old seedlings were subjected to 0, 80, and 480-mM NaCl for 2 d.

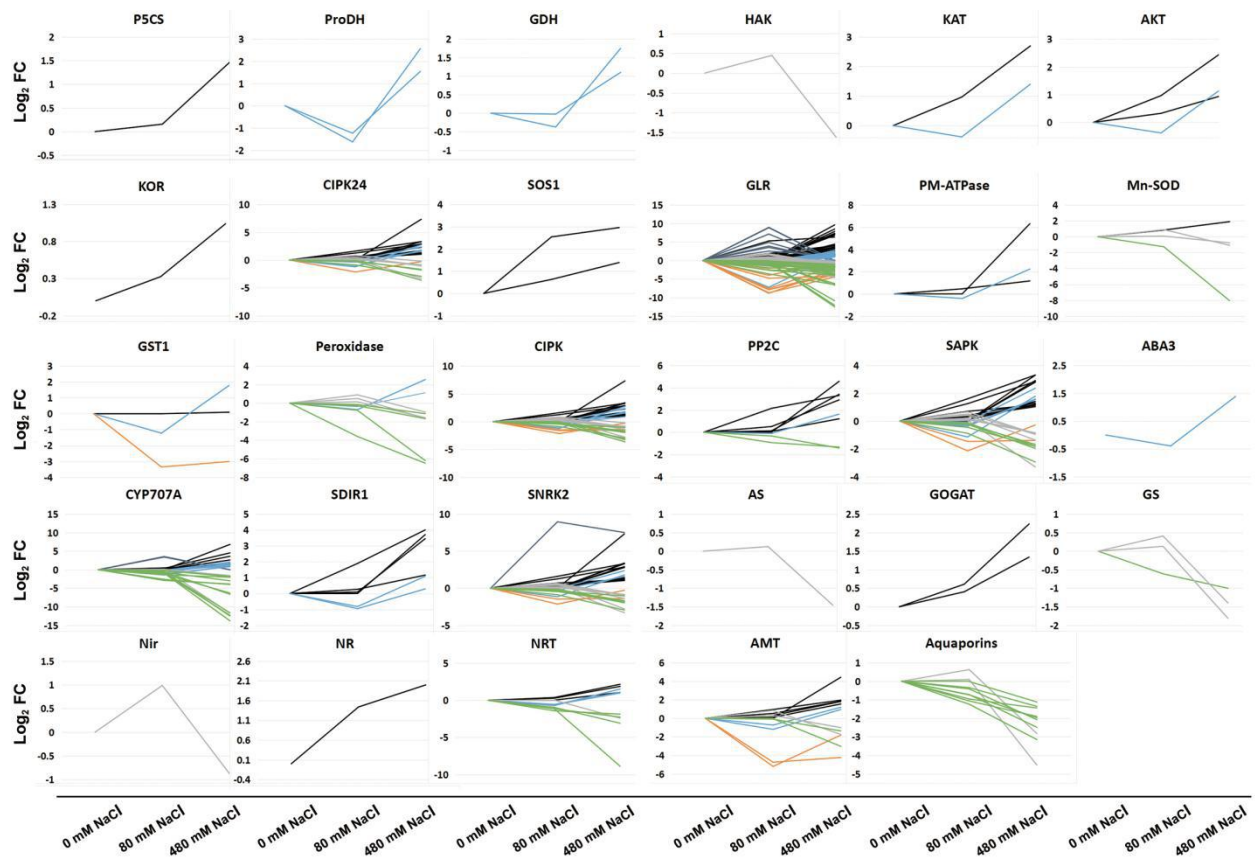

**Supplementary Figure 5.** Effects of salinity stress on the expression of different members of salinity-tolerant gene families in leaves of *K. sieversiana*. Each curve represents a member of a certain gene family. The 30-d-old seedlings were subjected to 0, 80, and 480mM NaCl for 2 d.

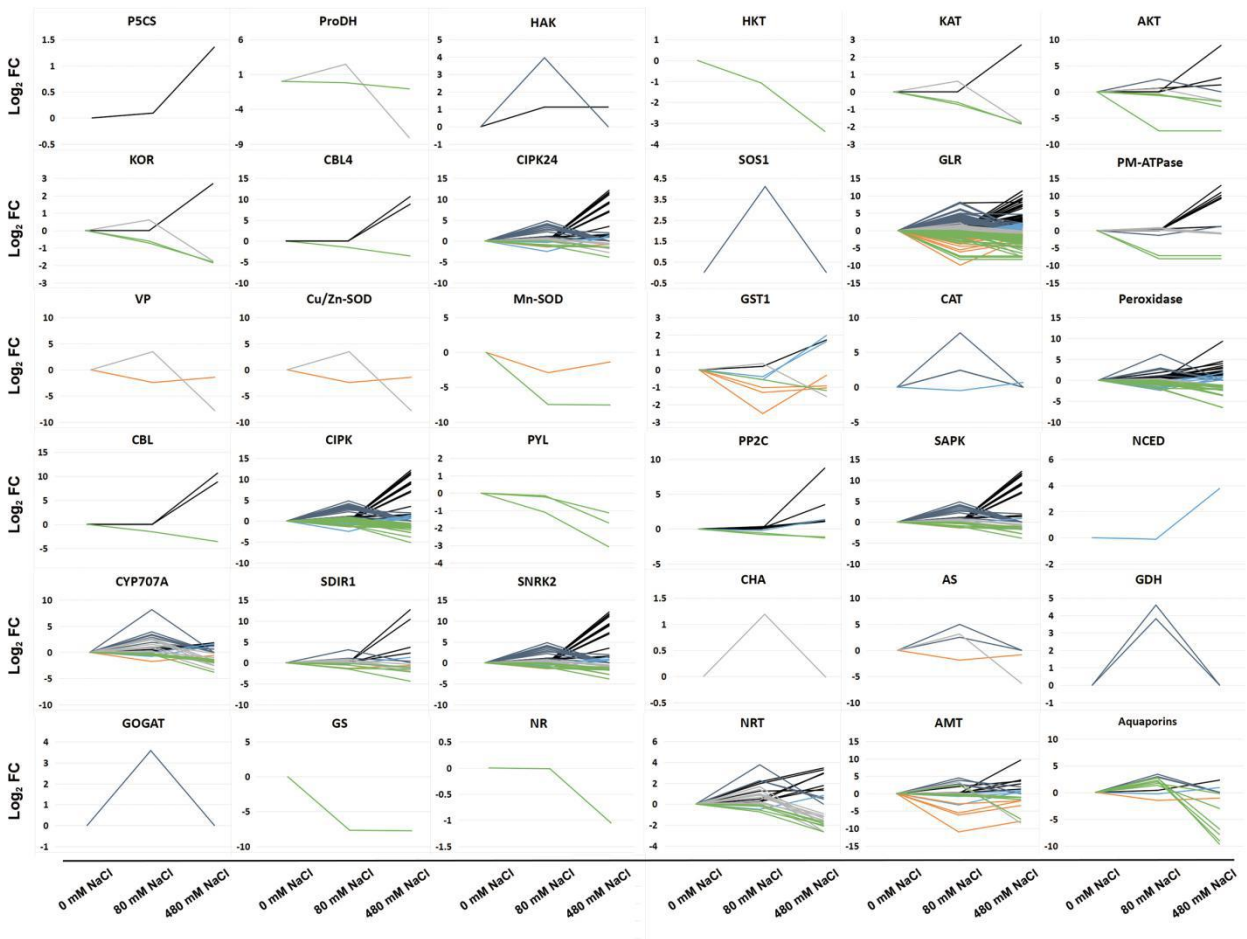

**Supplementary Figure 6.** Effects of salinity stress on the expression levels of different members of salinity-tolerant gene families in roots of *K. sieversiana*. Each curve represents a member of a certain gene family. The 30-d-old seedlings were subjected to 0, 80 and 480mM NaCl for 2 d.

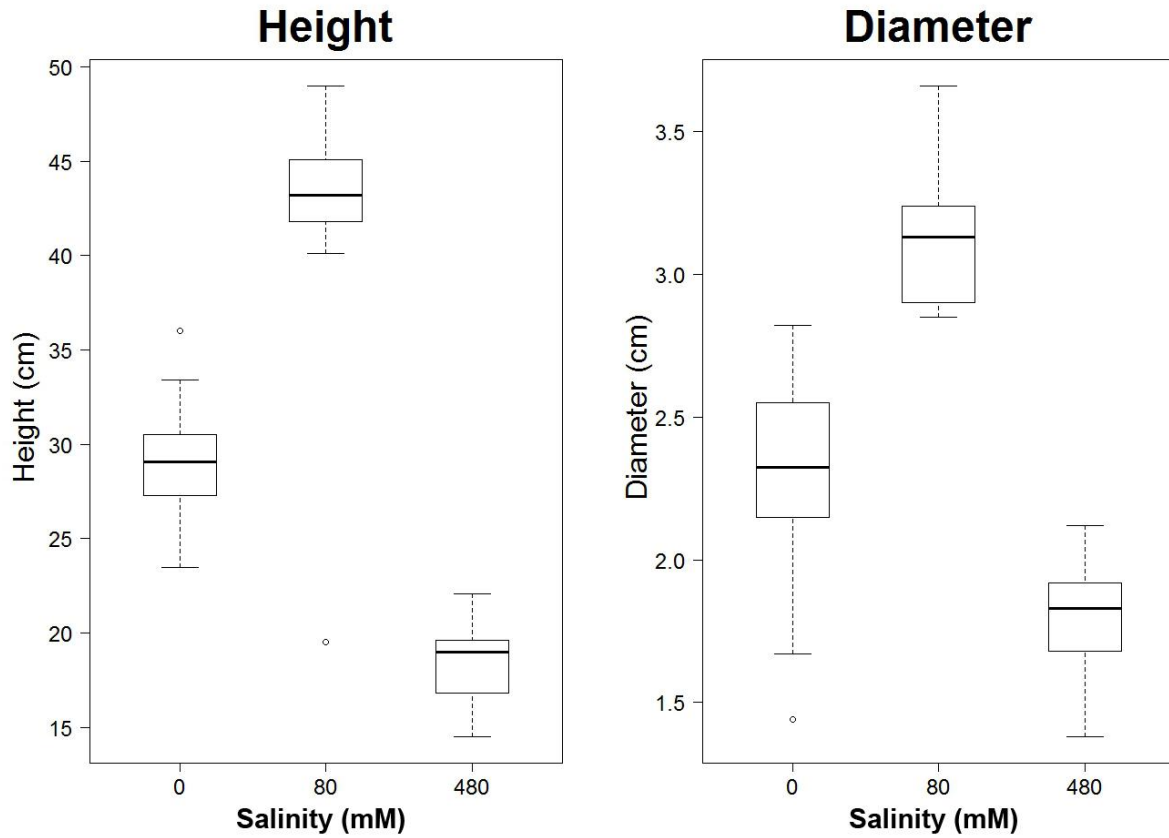

**Supplementary Figure 7.** Effects of salinity stress on the height (A) and the stem diameter (B) of *K. sieversiana*. Thirty individuals for each treatment were used in the Boxplot. The 30-d-old seedlings were subjected to 0, 80, and 480mM NaCl for 30 d.



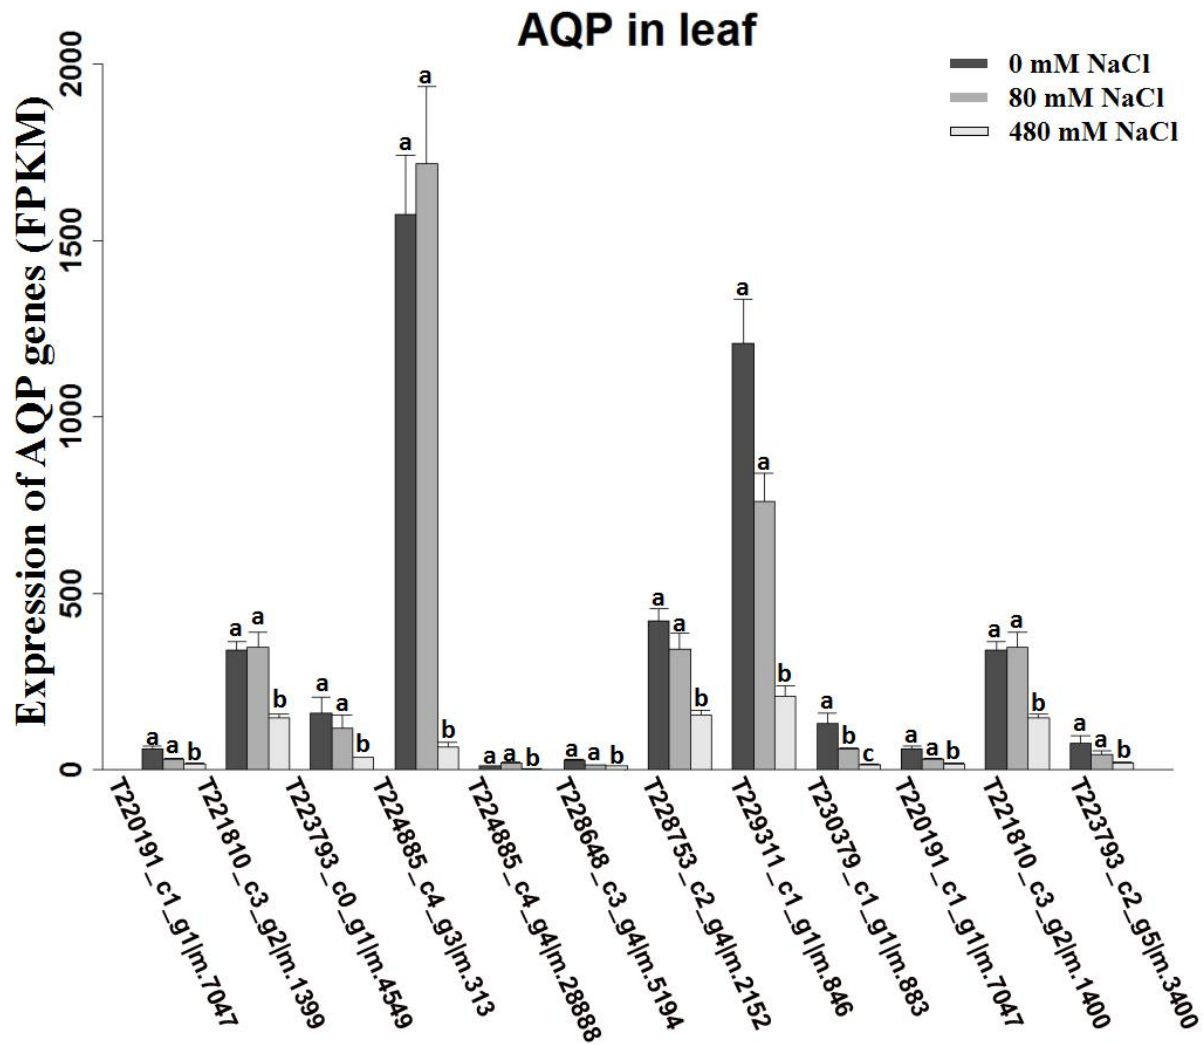

**Supplementary Figure 8.** Expression levels of aquaporin-like unigenes in leaves of *K. sieversiana* under different salinity treatments. The values are means of three replicates ( $\pm$  SE). The 30-d-old seedlings were subjected to 0,80, and 480mM NaCl for 2 d. Different letters above the bars indicate significant differences among treatments, according to a least significant difference test ( $P \leq 0.05$ ).

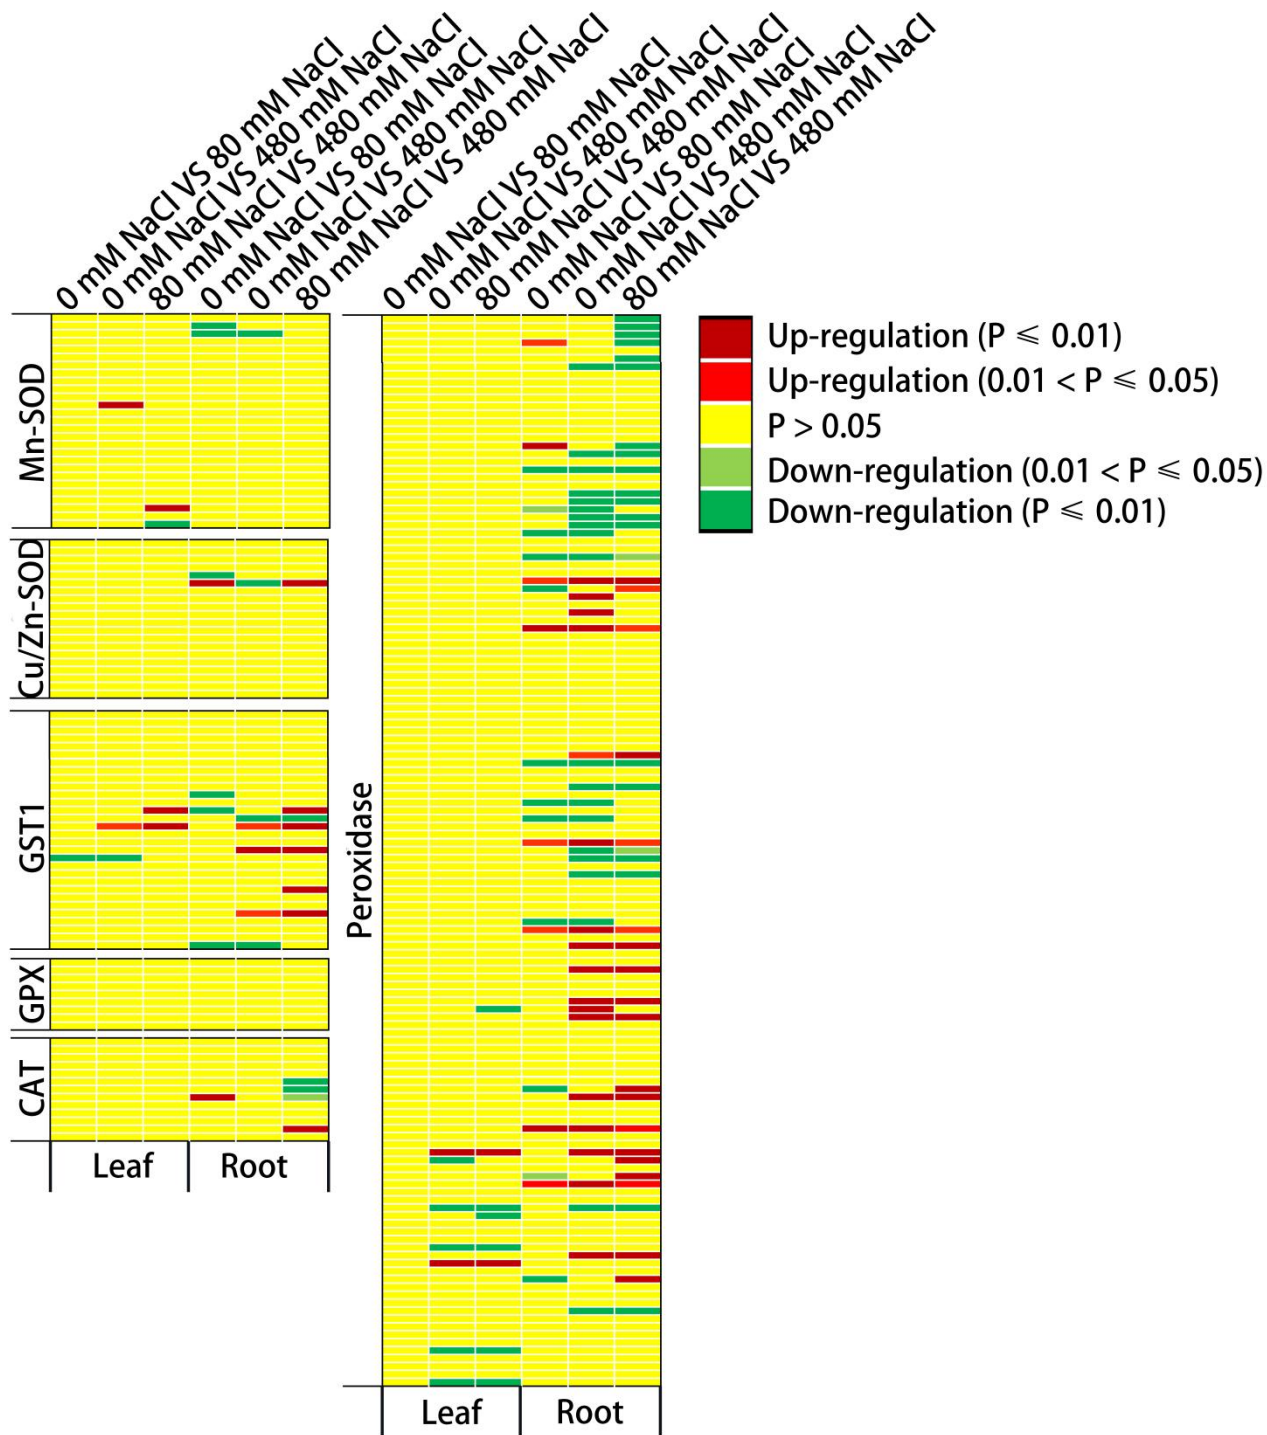

**Supplementary Figure 9.** Effects of salinity stresses on expression of antioxidative enzyme genes. The 30-d-old seedlings were subjected to 0, 80 and 480mM NaCl for 2 d.

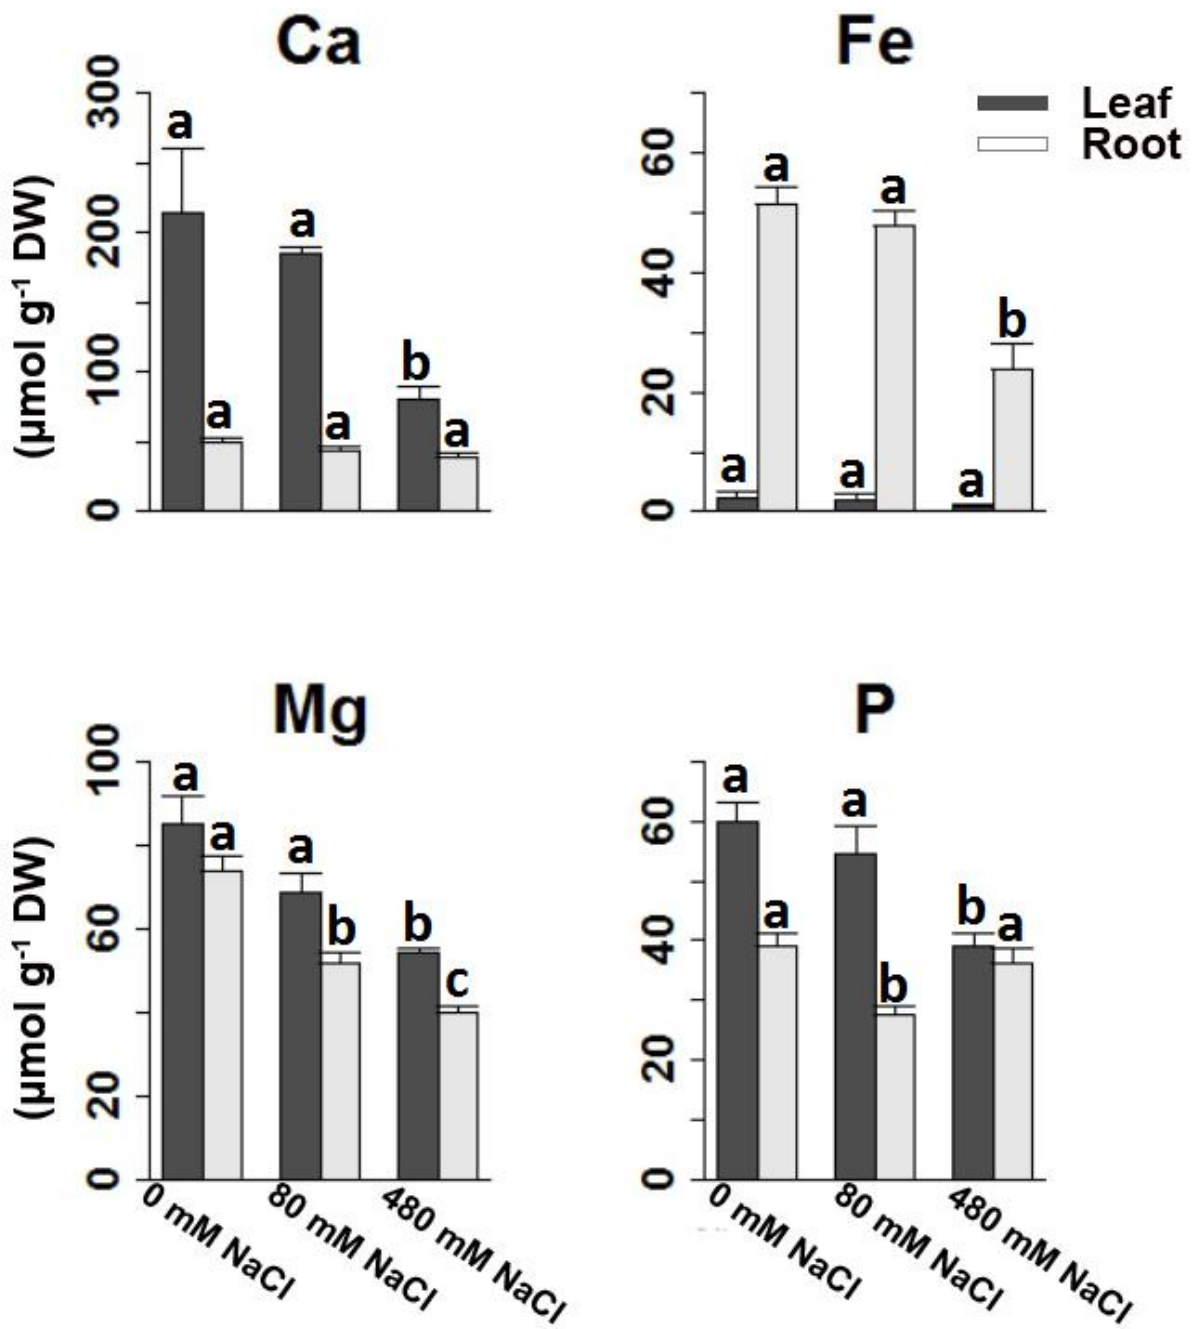

**Supplementary Figure 10.** Effects of salinity stress on the contents of Ca, Fe, Mg and P in *K. sieversiana*. The 30-d-old seedlings were subjected to 0,80 and 480mM NaCl for 30 d. Different letters above the bars indicate significant differences among treatments according to a least significant difference test ( $P \leq 0.05$ ).

**Supplementary Table 1. Primer information for the validation of DEGs.**

|                                | F                          | R                        |
|--------------------------------|----------------------------|--------------------------|
| UBQ 10                         | GAAAGCAGTTGGAAGATGGCAGGAC  | CGAAGACGCAGAACCAGGTGGAG  |
| TRINITY_DN223354_c1_g1 m.6046  | CGGGCATTCTTCAGTGATAGGGG    | TCTCGGCTTTATTTCCAGGGGTT  |
| TRINITY_DN224332_c0_g4 m.1276  | TTGGAAGGACTTTACTGTCTCACC   | CTATTCCGACTTAACCTTGGACG  |
| TRINITY_DN223233_c1_g1 m.16947 | TCACCATTACTTATGCCCTCCTT    | TGACTACTGCTGGACCGATACTTC |
| TRINITY_DN225973_c1_g3 m.8014  | CGACGGCTGCGTTGACTACTTTG    | GCCCGAGCTTCTTCAGGATTACG  |
| TRINITY_DN198904_c0_g1 m.9620  | ACCCAAACAAATAATAATGGCTGAA  | GAGGAGTCAAATGATGCGAAGTA  |
| TRINITY_DN227624_c1_g4 m.7191  | TGGACTTGGGCTTCAGAATGGTA    | TAGCGGCTGTATGACTTGTTGTT  |
| TRINITY_DN219148_c0_g1 m.7706  | ATGCTTCTCATTAGTCTTATTCGTGC | GACCTTACTACGCCCTCAACTCC  |
| TRINITY_DN224752_c1_g2 m.7735  | AAAGGCAATCTGACTGACAATACA   | AACACTTATCAACTGGACCTCCC  |
| TRINITY_DN226384_c0_g1 m.2958  | AGTTGTGGGACCCGTTGGTTCAT    | AAGCCCGGCTTTGCTCGTTTTCT  |
| TRINITY_DN226441_c0_g1 m.777   | GATGAAGGGAATAAGTTGTGGCT    | AGGATGACCGTCGTATCGTTGTA  |

**Supplementary Table 2. Overview of unigene annotations.**

|                   | <b>Numbers of unigenes</b> | <b>Percentage of unigenes(%)</b> |
|-------------------|----------------------------|----------------------------------|
| <b>NR</b>         | 38,686                     | 82.62                            |
| <b>Swiss-prot</b> | 29,309                     | 62.59                            |
| <b>GO</b>         | 3,306                      | 7.06                             |
| <b>KAAS</b>       | 6,774                      | 14.47                            |
| <b>COG</b>        | 30,464                     | 65.06                            |
| <b>CDD</b>        | 14,265                     | 30.47                            |

**Supplementary Table 3. KEGG pathway enrichment of *K. sieversiana* unigenes.**

|             | <b>Pathway ID</b> |                                | <b>Pathway</b>                              |                                             | <b>DEGs with pathway</b> | <b>All genes with pathway</b> |
|-------------|-------------------|--------------------------------|---------------------------------------------|---------------------------------------------|--------------------------|-------------------------------|
|             | <b>ko03010</b>    | Genetic Information Processing | Translation                                 | Ribosome                                    | 114                      | 240                           |
|             | <b>ko00195</b>    | Metabolism                     | Energy metabolism                           | Photosynthesis                              | 32                       | 55                            |
|             | <b>ko00196</b>    | Metabolism                     | Energy metabolism                           | Photosynthesis - antenna proteins           | 9                        | 15                            |
|             | <b>ko00261</b>    | Metabolism                     | Biosynthesis of other secondary metabolites | Monobactam biosynthesis                     | 6                        | 7                             |
| <b>Leaf</b> | <b>ko00860</b>    | Metabolism                     | Metabolism of cofactors and vitamins        | Porphyrin and chlorophyll metabolism        | 16                       | 41                            |
|             | <b>ko00300</b>    | Metabolism                     | Amino acid metabolism                       | Lysine biosynthesis                         | 7                        | 11                            |
|             | <b>ko00260</b>    | Metabolism                     | Amino acid metabolism                       | Glycine, serine and threonine metabolism    | 20                       | 64                            |
|             | <b>ko00710</b>    | Metabolism                     | Energy metabolism                           | Carbon fixation in photosynthetic organisms | 16                       | 48                            |
|             | <b>ko04110</b>    | Cellular Processes             | Cell growth and death                       | Cell cycle                                  | 23                       | 85                            |
| <b>Root</b> | <b>ko00940</b>    | Metabolism                     | Biosynthesis of other secondary metabolites | Phenylpropanoid biosynthesis                | 43                       | 119                           |

|                |                                      |                                 |                                             |    |     |
|----------------|--------------------------------------|---------------------------------|---------------------------------------------|----|-----|
| <b>ko00280</b> | Metabolism                           | Amino acid metabolism           | Valine, leucine and isoleucine degradation  | 17 | 51  |
| <b>ko00073</b> | Metabolism                           | Lipid metabolism                | Cutin, suberine and wax biosynthesis        | 10 | 21  |
| <b>ko04016</b> | Environmental Information Processing | Signal transduction             | MAPK signaling pathway - plant              | 25 | 105 |
| <b>ko00250</b> | Metabolism                           | Amino acid metabolism           | Alanine, aspartate and glutamate metabolism | 12 | 37  |
| <b>ko00052</b> | Metabolism                           | Carbohydrate metabolism         | Galactose metabolism                        | 12 | 38  |
| <b>ko00196</b> | Metabolism                           | Energy metabolism               | Photosynthesis - antenna proteins           | 7  | 15  |
| <b>ko00270</b> | Metabolism                           | Amino acid metabolism           | Cysteine and methionine metabolism          | 18 | 74  |
| <b>ko00260</b> | Metabolism                           | Amino acid metabolism           | Glycine, serine and threonine metabolism    | 16 | 64  |
| <b>ko00710</b> | Metabolism                           | Energy metabolism               | Carbon fixation in photosynthetic organisms | 13 | 48  |
| <b>ko00071</b> | Metabolism                           | Lipid metabolism                | Fatty acid degradation                      | 11 | 40  |
| <b>ko00910</b> | Metabolism                           | Energy metabolism               | Nitrogen metabolism                         | 8  | 25  |
| <b>ko00195</b> | Metabolism                           | Energy metabolism               | Photosynthesis                              | 13 | 55  |
| <b>ko00430</b> | Metabolism                           | Metabolism of other amino acids | Taurine and hypotaurine metabolism          | 4  | 7   |

|                |                                      |                         |                                   |    |     |
|----------------|--------------------------------------|-------------------------|-----------------------------------|----|-----|
| <b>ko04075</b> | Environmental Information Processing | Signal transduction     | Plant hormone signal transduction | 27 | 159 |
| <b>ko03320</b> | Organismal Systems                   | Endocrine system        | PPAR signaling pathway            | 8  | 28  |
| <b>ko00500</b> | Metabolism                           | Carbohydrate metabolism | Starch and sucrose metabolism     | 18 | 94  |

---



**Supplementary Table 4. Validation of DEGs by real-time quantitative PCR.**

| <b>ID</b>                      | <b>R<sup>2</sup></b> | <b>P</b> |
|--------------------------------|----------------------|----------|
| TRINITY_DN223354_c1_g1 m.6046  | 0.89                 | 0.017    |
| TRINITY_DN224332_c0_g4 m.1276  | 0.7                  | 0.118    |
| TRINITY_DN223233_c1_g1 m.16947 | 0.87                 | 0.024    |
| TRINITY_DN225973_c1_g3 m.8014  | 0.84                 | 0.036    |
| TRINITY_DN198904_c0_g1 m.9620  | 0.96                 | 0.002    |
| TRINITY_DN227624_c1_g4 m.7191  | 0.79                 | 0.062    |
| TRINITY_DN219148_c0_g1 m.7706  | 0.92                 | 0.008    |
| TRINITY_DN224752_c1_g2 m.7735  | 0.97                 | 0.002    |
| TRINITY_DN226384_c0_g1 m.2958  | 0.98                 | 0.001    |
| TRINITY_DN226441_c0_g1 m.777   | 0.68                 | 0.138    |

**Supplementary Table 5. Effects of salinity stress on expression of ion compartmentation genes.** The 30-d-old seedlings were subjected to 0, 80 and 480mM NaCl for 2 d.

| Genes ID                       | Leaf (FPKM)                 |                             |                             | Root (FPKM)                 |                             |                             | Genes family |
|--------------------------------|-----------------------------|-----------------------------|-----------------------------|-----------------------------|-----------------------------|-----------------------------|--------------|
|                                | 0 mM NaCl                   | 80 mM NaCl                  | 480 mM NaCl                 | 0 mM NaCl                   | 80 mM NaCl                  | 480 mM NaCl                 |              |
| TRINITY_DN216785_c2_g2 m.13772 | 1.75 ± 0.06 <sup>a</sup>    | 1.60 ± 0.05 <sup>a</sup>    | 5.52 ± 0.78 <sup>a</sup>    | 30.08 ± 1.39 <sup>a</sup>   | 34.92 ± 1.57 <sup>a</sup>   | 40.84 ± 0.41 <sup>a</sup>   | NHX          |
| TRINITY_DN218503_c0_g2 m.12824 | 1.50 ± 0.08 <sup>a</sup>    | 1.99 ± 0.22 <sup>a</sup>    | 4.08 ± 0.33 <sup>a</sup>    | 13.48 ± 0.43 <sup>a</sup>   | 15.58 ± 0.84 <sup>a</sup>   | 15.77 ± 0.37 <sup>a</sup>   | NHX          |
| TRINITY_DN226373_c0_g2 m.5681  | 67.92 ± 6.20 <sup>a</sup>   | 83.86 ± 15.37 <sup>a</sup>  | 102.56 ± 7.12 <sup>a</sup>  | 21.56 ± 1.05 <sup>a</sup>   | 35.18 ± 3.05 <sup>a</sup>   | 39.12 ± 1.06 <sup>a</sup>   | NHX          |
| TRINITY_DN218402_c0_g2 m.2511  | 122.03 ± 12.64 <sup>a</sup> | 143.31 ± 19.37 <sup>a</sup> | 81.01 ± 7.17 <sup>a</sup>   | 15.44 ± 0.40 <sup>c</sup>   | 21.11 ± 1.16 <sup>b</sup>   | 33.30 ± 1.55 <sup>a</sup>   | HA           |
| TRINITY_DN228495_c2_g2 m.162   | 171.02 ± 9.57 <sup>a</sup>  | 220.40 ± 23.87 <sup>a</sup> | 146.49 ± 10.62 <sup>a</sup> | 533.17 ± 64.77 <sup>a</sup> | 432.29 ± 27.62 <sup>a</sup> | 434.73 ± 26.10 <sup>a</sup> | AVP1         |
| TRINITY_DN220826_c3_g1 m.7289  | 1.92 ± 0.40 <sup>a</sup>    | 2.11 ± 0.41 <sup>a</sup>    | 3.82 ± 1.35 <sup>a</sup>    | 107.98 ± 16.78 <sup>a</sup> | 98.05 ± 8.77 <sup>a</sup>   | 118.90 ± 18.16 <sup>a</sup> | AVP1         |

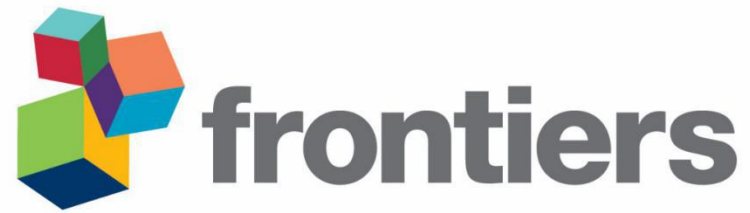

Supplement: FiguresandTables.pdf [file FiguresandTables.pdf]
